# Supplementary material
Source: MDPI journal article supplement (https://www.mdpi.com/2073-4395/13/1/93)
Supplement: s1 [file s1]

**Table S1. qRT-PCR primer sequences**

| Name     | Forward Primer (5'→3')  | Reverse Primer (5'→3')  |
|----------|-------------------------|-------------------------|
| StMAPK1  | TAGTATGCTCTGCGTATG      | CGAGAAGGAGGTAACAAT      |
| StMAPK4  | CAGTATAATGTGTATGGTAATC  | TGCCAATCTTCTTGATAG      |
| StMAPK5  | GGAAGCATTATTACACAAT     | CTATTCAGTGAAGAACAA      |
| StMAPK6  | ATTGATGTCTGGTCTGTT      | CCAAGGATATTGAGAATAAGTT  |
| StMAPK7  | TCTGGTATATGAACTGATGGA   | CGAAGCAACTGGAATAGG      |
| StMAPK8  | TATGTGGAGTATAGGATGTAT   | ATAACTTCAGTGGATGGA      |
| StMAPK9  | TTCATCGTCGTTCAAGTA      | GCTCTCCTTCTTCTTCTT      |
| StMAPK10 | GCTAATGATGACTTGACT      | TAGGTGTATCGTTGAATG      |
| StMAPK13 | GGAAGTTATGGAGTAGTT      | GAAGGTGGTAAGATGATT      |
| StMAPK14 | TGCTTATGGAGTTGATTG      | AGGAAGTTGTCTGATGTA      |
| StMAPK15 | TCAATATCCTAAGCAACAAT    | CCTCATCAACTGTAATCC      |
| StMAPK16 | CACGCCTCTGATGCTATT      | ATTCTCTTGATGTCCACGATAT  |
| StMAPK18 | AGACGAAGGAGGAGATAG      | CTCATACACAATATACACATCAT |
| StMAPK19 | CATTACGCCTACTTGAAC      | TTGATATTGGTGGTCTACA     |
| StMAPK20 | GCGTCTTATTATGGAGTTGAT   | AGGAAGTTGTCCGATGTAT     |
| StMAPKK1 | CGCTTCTACTACTACTATCTC   | GACTTCATACACAGTTCCA     |
| StMAPKK2 | TGGACTGGAGGAATTGAAG     | ATCGGATGTAGAGGTAGGT     |
| StMAPKK4 | ATCCAGATGAATATACAAGAAGA | ACGGTCCATATACTCCAA      |
| StMAPKK7 | TTAATCGCATCGGTAGTG      | ACAGAATCCTCATGGTTAC     |
| StMAPKK8 | CAGTTATACAGCCATCAGACAA  | CCGCACAATACCACCATT      |

**Table S2.** *MAPK* and *MAPKK* family gene in potato

| Gene name | Gene ID              | Chromosome location        |
|-----------|----------------------|----------------------------|
| StMAPK1   | Soltu.DM.01G034030.1 | chr01:73636278-73638378(-) |
| StMAPK2   | Soltu.DM.08G028240.1 | chr08:57608479-57606379(+) |
| StMAPK3   | Soltu.DM.11G025980.1 | chr11:45978202-45980302(+) |
| StMAPK4   | Soltu.DM.12G019640.1 | chr12:46885325-46883225(+) |
| StMAPK5   | Soltu.DM.08G006040.1 | chr08:8386394-8388494(-)   |
| StMAPK6   | Soltu.DM.02G024700.1 | chr02:37976290-37974190(+) |
| StMAPK7   | Soltu.DM.02G024700.2 | chr02:37976308-37974208(+) |
| StMAPK8   | Soltu.DM.04G035830.1 | chr04:67074236-67076336(-) |
| StMAPK9   | Soltu.DM.01G023820.3 | chr01:62811782-62808782(+) |
| StMAPK10  | Soltu.DM.07G022020.3 | chr07:52137364-52135264()  |
| StMAPK11  | Soltu.DM.07G023200.1 | chr07:53221698-53223798(-) |
| StMAPK12  | Soltu.DM.10G003160.1 | chr10:2415719-2413619(+)   |
| StMAPK13  | Soltu.DM.07G022020.1 | chr07:52137364-52135264(+) |
| StMAPK14  | Soltu.DM.07G022020.2 | chr07:52137364-52135264(+) |
| StMAPK15  | Soltu.DM.01G023820.1 | chr01:62811782-62808782(+) |
| StMAPK16  | Soltu.DM.01G023820.2 | chr01:62811081-62808081(+) |
| StMAPK17  | Soltu.DM.10G003160.2 | chr10:2415719-2413619(+)   |
| StMAPK18  | Soltu.DM.12G011730.1 | chr12:12361310-12359210(+) |
| StMAPK19  | Soltu.DM.06G024930.1 | chr06:50904920-50907020(-) |
| StMAPK20  | Soltu.DM.05G004980.1 | chr05:4325857-4323757(+)   |

|          |                      |                            |
|----------|----------------------|----------------------------|
| StMAPKK1 | Soltu.DM.03G033980.1 | Chr03:57465461-57467561(-) |
| StMAPKK2 | Soltu.DM.03G033980.2 | Chr03:57465461-57467561(-) |
| StMAPKK3 | Soltu.DM.03G019540.1 | chr03:44266677-44264577(+) |
| StMAPKK4 | Soltu.DM.12G025970.1 | chr12:55975774-55973674(+) |
| StMAPKK5 | Soltu.DM.03G033980.3 | chr03:57465461-57467561(-) |
| StMAPKK6 | Soltu.DM.03G023940.1 | chr03:49232546-49230446(+) |
| StMAPKK7 | Soltu.DM.03G023940.2 | chr03:49232546-49230446(+) |
| StMAPKK8 | Soltu.DM.03G037580.1 | chr03:60296915-60294815(+) |

**Table S3.** The *cis*-elements responsive to stresses and hormones in the promoter regions of *StMAPK* and *StMAPKK* genes

| Name     | ABRE | MBS | HSE | LTR | TC-rich repeats |
|----------|------|-----|-----|-----|-----------------|
| StMAPK1  | 1    | 1   | 0   | 0   | 0               |
| StMAPK2  | 2    | 0   | 0   | 0   | 0               |
| StMAPK3  | 1    | 1   | 0   | 0   | 0               |
| StMAPK4  | 1    | 0   | 0   | 0   | 0               |
| StMAPK5  | 1    | 1   | 1   | 0   | 0               |
| StMAPK6  | 1    | 1   | 1   | 0   | 0               |
| StMAPK7  | 0    | 0   | 0   | 0   | 0               |
| StMAPK8  | 5    | 2   | 0   | 0   | 0               |
| StMAPK9  | 1    | 2   | 0   | 0   | 0               |
| StMAPK10 | 3    | 0   | 0   | 1   | 0               |

---

|          |   |   |   |   |   |
|----------|---|---|---|---|---|
| StMAPK11 | 3 | 0 | 0 | 1 | 0 |
| StMAPK12 | 3 | 0 | 0 | 1 | 0 |
| StMAPK13 | 0 | 1 | 0 | 2 | 1 |
| StMAPK14 | 0 | 0 | 0 | 0 | 0 |
| StMAPK15 | 0 | 0 | 0 | 0 | 0 |
| StMAPK16 | 2 | 0 | 0 | 1 | 0 |
| StMAPK17 | 2 | 0 | 0 | 1 | 0 |
| StMAPK18 | 1 | 2 | 0 | 1 | 0 |
| StMAPK19 | 0 | 0 | 0 | 1 | 0 |
| StMAPK20 | 4 | 3 | 0 | 0 | 0 |
| StMAPKK1 | 6 | 0 | 0 | 0 | 0 |
| StMAPKK2 | 1 | 0 | 0 | 1 | 0 |
| StMAPKK3 | 1 | 0 | 0 | 1 | 0 |
| StMAPKK4 | 0 | 2 | 0 | 1 | 0 |
| StMAPKK5 | 0 | 2 | 0 | 1 | 0 |
| StMAPKK6 | 0 | 2 | 0 | 1 | 0 |
| StMAPKK7 | 0 | 0 | 0 | 0 | 0 |
| StMAPKK8 | 2 | 3 | 0 | 0 | 0 |

---

**Table S4.** Physical and Chemical Properties of StMAPK and StMAPKK protein

| Gene Name | Amino<br>Acid (aa) | Molecular<br>weight (kD) | Isoelectric<br>poin (pI) | Instability<br>index (II) | Aliphati<br>c index | Grand average<br>of<br>hydropathicity |
|-----------|--------------------|--------------------------|--------------------------|---------------------------|---------------------|---------------------------------------|
| StMAPK1   | 373                | 42817.77                 | 5.86                     | 42.62                     | 87.56               | -0.357                                |
| StMAPK2   | 379                | 43454.69                 | 5.91                     | 44.95                     | 92.59               | -0.305                                |
| StMAPK3   | 372                | 42685.76                 | 4.97                     | 42.93                     | 93.82               | -0.297                                |
| StMAPK4   | 396                | 49957.41                 | 5.49                     | 45.71                     | 87.98               | -0.309                                |
| StMAPK5   | 468                | 52974.55                 | 5.52                     | 40.69                     | 87.37               | -0.293                                |
| StMAPK6   | 370                | 42708.53                 | 8.02                     | 39.36                     | 97.78               | -0.150                                |
| StMAPK7   | 376                | 43481.36                 | 8.02                     | 38.69                     | 96.22               | -0.191                                |
| StMAPK8   | 372                | 42825.56                 | 6.32                     | 46.01                     | 95.40               | -0.252                                |
| StMAPK9   | 423                | 48892.33                 | 8.69                     | 39.98                     | 83.26               | -0.449                                |
| StMAPK10  | 476                | 54980.10                 | 9.09                     | 35.37                     | 82.79               | -0.504                                |
| StMAPK11  | 603                | 68234.42                 | 9.37                     | 38.96                     | 81.84               | -0.399                                |
| StMAPK12  | 470                | 53868.89                 | 9.20                     | 32.59                     | 84.04               | -0.403                                |
| StMAPK13  | 613                | 69709.84                 | 9.25                     | 34.59                     | 78.94               | -0.510                                |
| StMAPK14  | 612                | 69638.76                 | 9.25                     | 34.63                     | 78.91               | -0.514                                |
| StMAPK15  | 565                | 64379.58                 | 8.85                     | 42.64                     | 77.88               | -0.540                                |
| StMAPK16  | 565                | 64394.58                 | 8.70                     | 42.58                     | 77.88               | -0.517                                |
| StMAPK17  | 593                | 67184.24                 | 9.22                     | 31.42                     | 83.73               | -0.412                                |
| StMAPK18  | 575                | 65699.51                 | 6.47                     | 47.73                     | 80.90               | -0.549                                |

---

|          |     |          |      |       |        |        |
|----------|-----|----------|------|-------|--------|--------|
| StMAPK19 | 605 | 69042.25 | 7.07 | 42.31 | 78.36  | -0.565 |
| StMAPK20 | 504 | 57819.61 | 5.92 | 44.09 | 83.41  | -0.434 |
| StMAPKK1 | 354 | 39633.59 | 5.89 | 46.23 | 99.35  | -0.103 |
| StMAPKK2 | 309 | 34556.75 | 5.93 | 44.91 | 99.00  | -0.062 |
| StMAPKK3 | 333 | 37256.85 | 8.35 | 55.75 | 84.32  | -0.290 |
| StMAPKK4 | 357 | 39659.38 | 5.47 | 38.53 | 90.64  | -0.110 |
| StMAPKK5 | 361 | 40282.45 | 6.15 | 46.05 | 100.66 | 0.027  |
| StMAPKK6 | 515 | 57453.54 | 5.56 | 36.56 | 89.18  | -0.167 |
| StMAPKK7 | 515 | 57453.54 | 5.56 | 36.56 | 89.18  | -0.167 |
| StMAPKK8 | 370 | 40819.35 | 8.87 | 65.07 | 79.35  | -0.373 |

---
